# Supplementary material
Source: PubMed Central journal article supplement (PMC3990680)
Supplement: embj0033-0021-sd3.pdf [file embj0033-0021-sd3.pdf]

# Figure 7B

Gel: 12.5% SDS-PAGE gel

MW Marker: BenchMark pre-stained (Invitrogen 10748-010)

1<sup>st</sup> Antibody: rabbit anti-HA, 1:1,000 (Sigma Aldrich H6908)

2<sup>nd</sup> Antibody: goat anti-rabbit IgG, HRP labelled 1:10,000 (Sigma Aldrich A6154)

Image acquisition: Incubation with HRP substrate and exposure to Film (2 second)

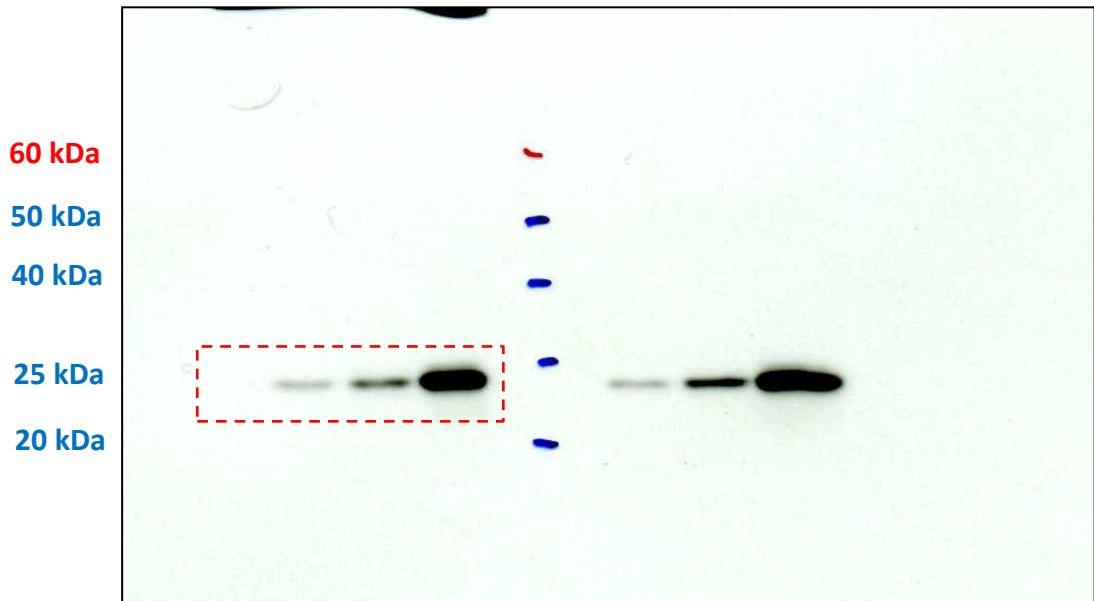

Lane order:

Vector control, *minHIS3*, *staHIS3*, *maxHIS3* (Replicate 1, 10  $\mu$ l load)

Marker

Vector control, *minHIS3*, *staHIS3*, *maxHIS3* (Replicate 2, 10  $\mu$ l load)

Approximate area used in figure 7B is outlined
