# Supplementary material
Source: PubMed Central journal article supplement (PMC3990680)
Supplement: embj0033-0021-sd4.pdf [file embj0033-0021-sd4.pdf]

## Supplemental Information

### Contents

1. Codon decoding times as estimated by the computational decoding model.
2. Recombinant sequences used to generate data in figure 1.
3. Alignments of codon variants and resulting speed changes.
4. Plasmids used in this study.
5. qPCR assays
  - a. qPCR primer sequences
  - b. qPCR protocol
  - c. Primer strategy for comparison between codon variant transcripts

**Supplemental Table 1.** Average times for codon-specific decoding cycles in seconds as predicted by the computational model.

|                      |   | 2 <sup>nd</sup> Base |       |     |       |      |        |     |       |   |
|----------------------|---|----------------------|-------|-----|-------|------|--------|-----|-------|---|
|                      |   | A                    |       | C   |       | G    |        | U   |       |   |
| 1 <sup>st</sup> Base | A | Lys                  | 0.052 | Thr | 0.390 | Arg  | 0.0316 | Ile | 0.595 | A |
|                      |   | Asn                  | 0.121 | Thr | 0.117 | Ser  | 0.327  | Ile | 0.087 | C |
|                      |   | Lys                  | 0.071 | Thr | 0.267 | Arg  | 0.529  | Met | 0.172 | G |
|                      |   | Asn                  | 0.135 | Thr | 0.113 | Ser  | 0.326  | Ile | 0.086 | U |
|                      | C | Gln                  | 0.105 | Pro | 0.233 | Arg  | 0.145  | Leu | 0.451 | A |
|                      |   | His                  | 0.251 | Pro | 0.918 | Arg  | 0.103  | Leu | 1.411 | C |
|                      |   | Gln                  | 1.233 | Pro | 0.056 | Arg  | 0.440  | Leu | 0.330 | G |
|                      |   | His                  | 0.184 | Pro | 0.927 | Arg  | 0.101  | Leu | 0.496 | U |
|                      | G | Glu                  | 0.069 | Ala | 0.495 | Gly  | 0.253  | Val | 1.022 | A |
|                      |   | Asp                  | 0.151 | Ala | 0.139 | Gly  | 0.070  | Val | 0.129 | C |
|                      |   | Glu                  | 0.569 | Ala | 0.056 | Gly  | 0.323  | Val | 0.464 | G |
|                      |   | Asp                  | 0.157 | Ala | 0.140 | Gly  | 0.068  | Val | 0.131 | U |
|                      | U | Stop                 |       | Ser | 0.829 | Stop |        | Leu | 0.187 | A |
|                      |   | Tyr                  | 0.216 | Ser | 0.118 | Cys  | 0.166  | Phe | 0.175 | C |
|                      |   | Stop                 |       | Ser | 1.372 | Trp  | 0.067  | Leu | 0.119 | G |
|                      |   | Tyr                  | 0.226 | Ser | 0.121 | Cys  | 0.166  | Phe | 0.174 | U |

3<sup>rd</sup> Base

**Supplemental Table 2. Recombinant sequences used to generate data in figure 1.**

>MinCFLuc

ATGGAGGACGCAAAAAACATAAAAAAGGGCCTGCGCCCTTCTATCCTCTCGAGGATGGGACGGCGGGGA  
GCAGCTCCATAAAGCGATGAAAAGGTACGCACTCGTGCCTGGGACGATAGCGTTTACGGATGCACATATAGA  
GGTGAACATAACGTACGCGGAGTACTTCGAGATGTGGTGGGCTCGCAGAGGGCGATGAAACGGTATGGGC  
TCAATACGAATCACAGGATAGTAGTATGCTCGGAGAACTCGCTCCAGTTCTTTATGCCTGTGCTCGGGGCGCT  
CTTTATAGGGGTGGCAGTGGCGCCCGCGAACGACATATATAATGAGCGGGAGCTCCTCAACTCGATGAACAT  
ATCGCAGCCTACGGTAGTGTGGTGTGCGAAAAAGGGCTCCAGAAAATACTCAACGTGCAGAAAAAACTCCCC  
ATAATACAGAAAATAATAATAATGGATTGAAAACGGATTACCAGGGGTTTCAGTCGATGTACACGTTTCGTAA  
CGTCGCATCTCCCTCCCGGTTAATGAGTACGATTTGTACCCGAGTCGTTTGATCGGGACAAAACGATAGC  
ACTCATAATGAATTCGTCGGGATCGACGGGGCTCCCTAAAGGGGTGGCACTCCCTCATAGGACGGCATGCGT  
AAGTTCTCGCATGCAAGGGACCCTATATTTGGGAATCAGATAATACCTGATACGGCGATACTCTCGGTGGTG  
CCCTCCATCACGGGTTTGGGATGTTTACGACGCTCGGGTATCTCATATGTGGGTTTCGGGTAGTACTCATGTA  
TAGGTTTGAGGAGGAGCTCTTTCTCCGGTCGCTCCAGGATTACAAAATACAGTCGGCGCTCCTCGTACCCACG  
CTCTTTTCGTTCTTCGAAAATCGACGCTCATAGACAAATACGATCTCTCGAATCTCCACGAGATAGCGTCGGG  
GGGGGCACCTCTCTCGAAAGAGGTAGGGGAGGCGGTGGCAAAACGGTTCATCTCCCGGGATACGGCAGG  
GGTATGGGCTCACGGAGACGACGTCGGCGATACTATAACGCCCCGAGGGGGATGATAAACCTGGGGCGGTA  
GGGAAAGTGGTGCCCTTTTTGAGGCGAAAGTGGTGGATCTCGATACGGGGAAAACGCTCGGGGTGAATCA  
GAGGGGGGAGCTCTGTGTAAGGGGGCCTATGATAATGTGGGGTATGTAAACAATCTGAGGCGACGAACG  
CACTCATAGACAAAGATGGGTGGCTCCATTCGGGGGACATAGCGTACTGGGACGAGGACGAGCACTTCTTCA  
TAGTGGACCGGCTCAAATCGCTCATAAAATACAAAGGGTATCAGGTGGCACCCGCGGAGCTCGAGTCGATAC  
TCCTCCAGCACCCCAACATATTCGACGCGGGGGTGGCAGGGCTCCCCGACGATGACGCAGGGGAGCTCCCCG  
CAGCAGTGGTGGTGTCTCGAGCACGGGAAAACGATGACGGAGAAAGAGATAGTGGATTACGTAGCATCGCAG  
GTAACGACGGCGAAAAAACTCCGGGGGGGGTGGTGTGGTGTGGACGAGGTACCTAAAGGGCTCACGGGGA  
AACTCGACGCAAGGAAAATAAGGGAGATACTCATAAAAGCAAAAAAAGGGGGGAAATAA

>StaCFLuc

ATGGAAGACGCCAAAAACATAAAGAAAGGCCCGCGCCATTCTATCCTCTAGAGGATGGAACCGCTGGAGAG  
CAACTGCATAAGGCTATGAAGAGATACGCCCTGGTTCCTGGAACAATTGCTTTTACAGATGCACATATCGAGG  
TGAACATCACGTACGCGGAATACTTCGAAATGTCCGTTTCGGTTGGCAGAAGCTATGAAACGATATGGGCTGA  
ATACAAATCACAGAATCGTCGTATGCAGTAAAACCTCTTTCAATTCTTTATGCCGGTGTGGGCGGTTATTT  
ATCGGAGTTGCAGTTGCGCCCGCGAACGACATTTATAATGAACGTGAATTGCTCAACAGTATGAACATTTTCGC  
AGCCTACCGTAGTGTGGTTCAAAAAGGGGTTGCAAAAAATTTTGAACGTGCAAAAAAAATTACCAATAAT  
CCAGAAAATTATTATCATGGATTCTAAAACGGATTACCAGGGATTTTCAGTCGATGTACACGTTTCGTACATCTC  
ATCTACCTCCCGTTTTAATGAATACGATTTTGTACCAGAGTCCTTTGATCGTGACAAAACAATTGCACTGATA  
ATGAATTCCTCTGGATCTACTGGGTACCTAAGGGTGTGGCCCTTCCGCATAGAACTGCCTGCGTCAGATTCTC  
GCATGCCAGAGATCCTATTTTTGGCAATCAAATCATTCCGGATACTGCGATTTAAGTGTGTTCCATTCCATCA  
CGGTTTTGGAATGTTTACTACACTCGGATATTTGATATGTGGATTTTCAGTCGTCTTAATGTATAGATTTGAAG  
AAGAGCTGTTTTTACGATCCCTTCAGGATTACAAAATTCAAAGTGC GTTGTAGTACCAACCCTATTTTCATTCT  
TCGCCAAAAGCACTCTGATTGACAAATACGATTTATCTAATTTACACGAAATTGCTTCTGGGGGCGCACCTCTT  
TCGAAAAGAAGTCGGGGAAAGCGGTTGCAAAACGCTTCATCTTCCAGGGATACGACAAGGATATGGGCTCACT  
GAGACTACATCAGCTATTCTGATTACCCCGAGGGGGATGATAAACCGGGCGCGGTTCGGTAAAGTTGTTCCA

TTTTTTGAAGCGAAGGTTGTGGATCTGGATACCGGGAAAACGCTGGGCGTTAATCAGAGAGGCGAATTATGT  
GTCAGAGGACCTATGATTATGTCCGGTTATGTAAACAATCCGGAAGCGACCAACGCCTTGATTGACAAGGATG  
GATGGCTACATTCTGGAGACATAGCTTACTGGGACGAAGACGAACACTTCTTCATAGTTGACCGCTTGAAGTC  
TTTAATTAATAACAAAGGATATCAGGTGGCCCCGCTGAATTGGAATCGATATTGTTACAACACCCCAACATCT  
TCGACGCGGGCGTGGCAGGTCTTCCCGACGATGACGCCGGTGAACCTCCCGCCGCCGTTGTTGTTTTGGAGCA  
CGGAAAGACGATGACGGAAAAAGAGATCGTGGATTACGTCGCCAGTCAAGTAACAACCGCGAAAAAGTTGC  
GCGGAGGAGTTGTGTTTGTGGACGAAGTACCGAAAGGTCTTACCGAAAACCTCGACGCAAGAAAAATCAGA  
GAGATCCTCATAAAGGCCAAGAAGGGCGGAAAGTAA

>MaxCFLuc

ATGGAAGACGCTAAGAACATTAAGAAGGGCCCAGCTCCATTCTACCCATTGGAAGACGGCACTGCTGGCGAA  
CAATTGCACAAGGCTATGAAGAGATACGCTTTGGTTCCAGGCACTATTGCTTTCACTGACGCTCACATTGAAGT  
TAACATTACTTACGCTGAATACTTCGAAATGTCTGTTAGATTGGCTGAAGCTATGAAGAGATACGGCTTGAAC  
ACTAACCACAGAATTGTTGTTTGTCTGAAAACCTTTGCAATTCTTCATGCCAGTTTTGGGCGCTTTGTTTATT  
GGCGTTGCTGTTGCTCCAGCTAACGACATTTACAACGAAAGAGAATTGTTGAACTCTATGAACATTTCTCAACC  
AACTGTTGTTTTCGTTTCTAAGAAGGGCTTGCAAAGATTTTGAACGTTCAAAGAAGTTGCCAATTATTCAA  
AGATTATTATTATGGACTCTAAGACTGACTACCAAGGCTTCCAATCTATGTACACTTTCGTTACTTCTCACTTGC  
CACCAGGCTTCAACGAATACGACTTCGTTCCAGAATCTTTCGACAGAGACAAGACTATTGCTTTGATTATGAAC  
TCTTCTGGCTCTACTGGCTTGCCAAAGGGCGTTGCTTTGCCACACAGAAGCTGCTTGCCTTAGATTCTCTCACGC  
TAGAGACCAATTTTCGCAACCAAAATTATCCAGACTGCTATTTTGTCTGTTGTTCCATTCCACCACGGCTT  
CGGCATGTTCACTACTTTGGGCTACTTGATTTGCGGCTTCAGAGTTGTTTTGATGTACAGATTGAAGAAGAAT  
TGTTCTTGAGATCTTTGCAAGACTACAAGATTCAATCTGCTTTGTTGGTTCCAATTTGTTCTTTCTTCGCTAA  
GTCTACTTTGATTGACAAGTACGACTTGCTAACTTGCACGAAATTGCTTCTGGCGGCGCTCCATTGTCTAAGG  
AAGTTGGCGAAGCTGTTGCTAAGAGATTCCACTTGCCAGGCATTAGACAAGGCTACGGCTTGACTGAAACTAC  
TTCTGCTATTTTATTACTCCAGAAGGCGACGACAAGCCAGGCGCTGTTGGCAAGGTTGTTCCATTCTTCGAA  
GCTAAGGTTGTTGACTTGGACTTGGCAAGACTTTGGGCGTTAACCAAAGAGGCGAATTGTGCGTTAGAGGC  
CCAATGATTATGTCTGGCTACGTTAACAACCCAGAAGCTACTAACGCTTTGATTGACAAGGACGGCTGGTTGC  
ACTCTGGCGACATTGCTTACTGGGACGAAGACGAACACTTCTTATTGTTGACAGATTGAAGTCTTTGATTAAG  
TACAAGGGCTACCAAGTTGCTCCAGCTGAATTGGAATCTATTTTGTGCAACACCCAAACATTTTCGACGCTGG  
CGTTGCTGGCTTGCCAGACGACGACGCTGGCGAATTGCCAGCTGCTGTTGTTGTTTTGGAACACGGCAAGACT  
ATGACTGAAAAGGAAATTGTTGACTACGTTGCTTCTCAAGTTACTACTGCTAAGAAGTTGAGAGGCGGCGTTG  
TTTTCGTTGACGAAGTTCCAAAGGGCTTGACTGGCAAGTTGGACGCTAGAAAGATTAGAGAAATTTTGATTAA  
GGCTAAGAAGGGCGGCAAGTAA

>Min4MaxCFLuc

ATGGAGGACGCAAAGAACATTAAGAAGGGCCCAGCTCCATTCTACCCATTGGAAGACGGCACTGCTGGCGAA  
CAATTGCACAAGGCTATGAAGAGATACGCTTTGGTTCCAGGCACTATTGCTTTCACTGACGCTCACATTGAAGT  
TAACATTACTTACGCTGAATACTTCGAAATGTCTGTTAGATTGGCTGAAGCTATGAAGAGATACGGCTTGAAC  
ACTAACCACAGAATTGTTGTTTGTCTGAAAACCTTTGCAATTCTTCATGCCAGTTTTGGGCGCTTTGTTTATT  
GGCGTTGCTGTTGCTCCAGCTAACGACATTTACAACGAAAGAGAATTGTTGAACTCTATGAACATTTCTCAACC  
AACTGTTGTTTTCGTTTCTAAGAAGGGCTTGCAAAGATTTTGAACGTTCAAAGAAGTTGCCAATTATTCAA  
AGATTATTATTATGGACTCTAAGACTGACTACCAAGGCTTCCAATCTATGTACACTTTCGTTACTTCTCACTTGC  
CACCAGGCTTCAACGAATACGACTTCGTTCCAGAATCTTTCGACAGAGACAAGACTATTGCTTTGATTATGAAC  
TCTTCTGGCTCTACTGGCTTGCCAAAGGGCGTTGCTTTGCCACACAGAAGCTGCTTGCCTTAGATTCTCTCACGC

TAGAGACCAATTTTCGGCAACCAAATTATCCAGACACTGCTATTTGTCTGTTGTTCCATTCCACCACGGCTT  
CGGCATGTTCACTACTTTGGGCTACTTGATTTGCGGCTTCAGAGTTGTTTTGATGTACAGATTCAAGAAGAAT  
TGTTCTTGAGATCTTTGCAAGACTACAAGATTCAATCTGCTTTGTTGGTTCCAACCTTTGTTCTCTTTCTTCGCTAA  
GTCTACTTTGATTGACAAGTACGACTTGTCTAACTTGCACGAAATTGCTTCTGGCGGCGCTCCATTGTCTAAGG  
AAGTTGGCGAAGCTGTTGCTAAGAGATTCCACTTGCCAGGCATTAGACAAGGCTACGGCTTGACTGAAACTAC  
TTCTGCTATTTGATTACTCCAGAAGGCGACGACAAGCCAGGCGCTGTTGGCAAGGTTGTTCCATTCTTCGAA  
GCTAAGGTTGTTGACTTGGACACTGGCAAGACTTTGGGCGTTAACCAAAGAGGCGAATTGTGCGTTAGAGGC  
CCAATGATTATGTCTGGCTACGTTAACAACCCAGAAGCTACTAACGCTTTGATTGACAAGGACGGCTGGTTGC  
ACTCTGGCGACATTGCTTACTGGGACGAAGACGAACACTTCTTCATTGTTGACAGATTGAAGTCTTTGATTAAG  
TACAAGGGCTACCAAGTTGCTCCAGCTGAATTGGAATCTATTTGTTGCAACACCCAAACATTTTCGACGCTGG  
CGTTGCTGGCTTCCAGACGACGACGCTGGCGAATTGCCAGCTGCTGTTGTTGTTTTGGAACACGGCAAGACT  
ATGACTGAAAAGGAAATTGTTGACTACGTTGCTTCTCAAGTTACTACTGCTAAGAAGTTGAGAGGCGGCGTTG  
TTTTCGTTGACGAAGTTCAAAGGGCTTGACTGGCAAGTTGGACGCTAGAAAGATTAGAGAAATTTTGATTAA  
GGCTAAGAAGGGCGGCAAGTAA

>Min8MaxCFLuc

ATGGAGGACGCAAAAAACATAAAAAAGGGCCAGCTCCATTCTACCCATTGGAAGACGGCACTGCTGGCGAA  
CAATTGCACAAGGCTATGAAGAGATACGCTTTGGTTCCAGGCACTATTGCTTTCACTGACGCTCACATTGAAGT  
TAACATTACTTACGCTGAATACTTCGAAATGTCTGTTAGATTGGCTGAAGCTATGAAGAGATACGGCTTGAAC  
ACTAACCACAGAATTGTTGTTTCTGCTGAAAACCTTTGCAATTCTTCATGCCAGTTTTGGGCGCTTTGTTTCATT  
GGCGTTGCTGTTGCTCCAGCTAACGACATTTACAACGAAAGAGAATTGTTGAACTCTATGAACATTTCTCAACC  
AACTGTTGTTTTCGTTTCTAAGAAGGGCTTGCAAAGATTTTGAACGTTCAAAGAGTTGCCAATTATTCAAA  
AGATTATTATTATGGACTCTAAGACTGACTACCAAGGCTTCCAATCTATGTACACTTTCGTTACTTCTCACTTGC  
CACCAGGCTTCAACGAATACGACTTCGTTCCAGAATCTTTCGACAGAGACAAGACTATTGCTTTGATTATGAAC  
TCTTCTGGCTCTACTGGCTTGCCAAAGGGCGTTGCTTTGCCACACAGAAGCTGCTTGCCTTAGATTCTCTCACGC  
TAGAGACCAATTTTCGGCAACCAAATTATCCAGACACTGCTATTTGTCTGTTGTTCCATTCCACCACGGCTT  
CGGCATGTTCACTACTTTGGGCTACTTGATTTGCGGCTTCAGAGTTGTTTTGATGTACAGATTCAAGAAGAAT  
TGTTCTTGAGATCTTTGCAAGACTACAAGATTCAATCTGCTTTGTTGGTTCCAACCTTTGTTCTCTTTCTTCGCTAA  
GTCTACTTTGATTGACAAGTACGACTTGTCTAACTTGCACGAAATTGCTTCTGGCGGCGCTCCATTGTCTAAGG  
AAGTTGGCGAAGCTGTTGCTAAGAGATTCCACTTGCCAGGCATTAGACAAGGCTACGGCTTGACTGAAACTAC  
TTCTGCTATTTGATTACTCCAGAAGGCGACGACAAGCCAGGCGCTGTTGGCAAGGTTGTTCCATTCTTCGAA  
GCTAAGGTTGTTGACTTGGACACTGGCAAGACTTTGGGCGTTAACCAAAGAGGCGAATTGTGCGTTAGAGGC  
CCAATGATTATGTCTGGCTACGTTAACAACCCAGAAGCTACTAACGCTTTGATTGACAAGGACGGCTGGTTGC  
ACTCTGGCGACATTGCTTACTGGGACGAAGACGAACACTTCTTCATTGTTGACAGATTGAAGTCTTTGATTAAG  
TACAAGGGCTACCAAGTTGCTCCAGCTGAATTGGAATCTATTTGTTGCAACACCCAAACATTTTCGACGCTGG  
CGTTGCTGGCTTCCAGACGACGACGCTGGCGAATTGCCAGCTGCTGTTGTTGTTTTGGAACACGGCAAGACT  
ATGACTGAAAAGGAAATTGTTGACTACGTTGCTTCTCAAGTTACTACTGCTAAGAAGTTGAGAGGCGGCGTTG  
TTTTCGTTGACGAAGTTCAAAGGGCTTGACTGGCAAGTTGGACGCTAGAAAGATTAGAGAAATTTTGATTAA  
GGCTAAGAAGGGCGGCAAGTAA

>Min12MaxCFLuc

ATGGAGGACGCAAAAAACATAAAAAAGGGCCTGCGCCATTCTACCCATTGGAAGACGGCACTGCTGGCGAA  
CAATTGCACAAGGCTATGAAGAGATACGCTTTGGTTCCAGGCACTATTGCTTTCACTGACGCTCACATTGAAGT  
TAACATTACTTACGCTGAATACTTCGAAATGTCTGTTAGATTGGCTGAAGCTATGAAGAGATACGGCTTGAAC

ACTAACCACAGAATTGTTGTTTGTCTGAAAACCTTTGCAATTCTTCATGCCAGTTTTGGGCGCTTTGTTTCATT  
GGCGTTGCTGTTGCTCCAGCTAACGACATTTACAACGAAAGAGAATTGTTGAACTCTATGAACATTTCTCAACC  
AACTGTTGTTTTCGTTTCTAAGAAGGGCTTGCAAAGATTTTGAACGTTCAAAGAAGTTGCCAATTATTCAA  
AGATTATTATTATGGACTCTAAGACTGACTACCAAGGCTTCCAATCTATGTACACTTTCGTTACTTCTCACTTGC  
CACCAGGCTTCAACGAATACGACTTCGTTCCAGAATCTTTGACAGAGACAAGACTATTGCTTTGATTATGAAC  
TCTTCTGGCTCTACTGGCTTGCCAAAGGGCGTTGCTTTGCCACACAGAAGCTGCTTGCGTTAGATTCTCTCACGC  
TAGAGACCCAATTTTCGGCAACCAAATTATTCCAGACACTGCTATTTTGTCTGTTGTTCCATTCCACCACGGCTT  
CGGCATGTTCACTACTTTGGGCTACTTGATTTGCGGCTTCAGAGTTGTTTTGATGTACAGATTCAAGAAGAAT  
TGTTCTTGAGATCTTTGCAAGACTACAAGATTCAATCTGCTTTGTTGGTTCCAACCTTTGTTCTTTCTTCGCTAA  
GTCTACTTTGATTGACAAGTACGACTTGCTAACTTGCACGAAATTGCTTCTGGCGGCGCTCCATTGTCTAAGG  
AAGTTGGCGAAGCTGTTGCTAAGAGATTCCACTTGCCAGGCATTAGACAAGGCTACGGCTTGACTGAAACTAC  
TTCTGCTATTTTGATTACTCCAGAAGGCGACGACAAGCCAGGCGCTGTTGGCAAGGTTGTTCCATTCTTCGAA  
GCTAAGGTTGTTGACTTGGACACTGGCAAGACTTTGGGCGTTAACCAAAGAGGCGAATTGTGCGTTAGAGGC  
CCAATGATTATGTCTGGCTACGTTAACAAACCCAGAAGCTACTAACGCTTTGATTGACAAGGACGGCTGGTTGC  
ACTCTGGCGACATTGCTTACTGGGACGAAGACGAACACTTCTTATTGTTGACAGATTGAAGTCTTTGATTAAG  
TACAAGGGCTACCAAGTTGCTCCAGCTGAATTGGAATCTATTTTGTGCAACACCCAAACATTTTCGACGCTGG  
CGTTGCTGGCTTGCCAGACGACGACGCTGGCGAATTGCCAGCTGCTGTTGTTGTTTTGGAACACGGCAAGACT  
ATGACTGAAAAGGAAATTGTTGACTACGTTGCTTCTCAAGTTACTACTGCTAAGAAGTTGAGAGGCGGCGTTG  
TTTTCGTTGACGAAGTTCCAAAGGGCTTGACTGGCAAGTTGGACGCTAGAAAGATTAGAGAAATTTTGATTAA  
GGCTAAGAAGGGCGGCAAGTAA

>Min16MaxCFLuc

ATGGAGGACGCAAAAAACATAAAAAAAGGGCCTGCGCCCTTCTATCCTTTGGAAGACGGCACTGCTGGCGAA  
CAATTGCACAAGGCTATGAAGAGATACGCTTTGGTTCCAGGCACTATTGCTTTCACTGACGCTCACATTGAAGT  
TAACATTACTTACGCTGAATACTTCGAAATGTCTGTTAGATTGGCTGAAGCTATGAAGAGATACGGCTTGAAC  
ACTAACCACAGAATTGTTGTTTGTCTGAAAACCTTTGCAATTCTTCATGCCAGTTTTGGGCGCTTTGTTTCATT  
GGCGTTGCTGTTGCTCCAGCTAACGACATTTACAACGAAAGAGAATTGTTGAACTCTATGAACATTTCTCAACC  
AACTGTTGTTTTCGTTTCTAAGAAGGGCTTGCAAAGATTTTGAACGTTCAAAGAAGTTGCCAATTATTCAA  
AGATTATTATTATGGACTCTAAGACTGACTACCAAGGCTTCCAATCTATGTACACTTTCGTTACTTCTCACTTGC  
CACCAGGCTTCAACGAATACGACTTCGTTCCAGAATCTTTGACAGAGACAAGACTATTGCTTTGATTATGAAC  
TCTTCTGGCTCTACTGGCTTGCCAAAGGGCGTTGCTTTGCCACACAGAAGCTGCTTGCGTTAGATTCTCTCACGC  
TAGAGACCCAATTTTCGGCAACCAAATTATTCCAGACACTGCTATTTTGTCTGTTGTTCCATTCCACCACGGCTT  
CGGCATGTTCACTACTTTGGGCTACTTGATTTGCGGCTTCAGAGTTGTTTTGATGTACAGATTCAAGAAGAAT  
TGTTCTTGAGATCTTTGCAAGACTACAAGATTCAATCTGCTTTGTTGGTTCCAACCTTTGTTCTTTCTTCGCTAA  
GTCTACTTTGATTGACAAGTACGACTTGCTAACTTGCACGAAATTGCTTCTGGCGGCGCTCCATTGTCTAAGG  
AAGTTGGCGAAGCTGTTGCTAAGAGATTCCACTTGCCAGGCATTAGACAAGGCTACGGCTTGACTGAAACTAC  
TTCTGCTATTTTGATTACTCCAGAAGGCGACGACAAGCCAGGCGCTGTTGGCAAGGTTGTTCCATTCTTCGAA  
GCTAAGGTTGTTGACTTGGACACTGGCAAGACTTTGGGCGTTAACCAAAGAGGCGAATTGTGCGTTAGAGGC  
CCAATGATTATGTCTGGCTACGTTAACAAACCCAGAAGCTACTAACGCTTTGATTGACAAGGACGGCTGGTTGC  
ACTCTGGCGACATTGCTTACTGGGACGAAGACGAACACTTCTTATTGTTGACAGATTGAAGTCTTTGATTAAG  
TACAAGGGCTACCAAGTTGCTCCAGCTGAATTGGAATCTATTTTGTGCAACACCCAAACATTTTCGACGCTGG  
CGTTGCTGGCTTGCCAGACGACGACGCTGGCGAATTGCCAGCTGCTGTTGTTGTTTTGGAACACGGCAAGACT  
ATGACTGAAAAGGAAATTGTTGACTACGTTGCTTCTCAAGTTACTACTGCTAAGAAGTTGAGAGGCGGCGTTG  
TTTTCGTTGACGAAGTTCCAAAGGGCTTGACTGGCAAGTTGGACGCTAGAAAGATTAGAGAAATTTTGATTAA  
GGCTAAGAAGGGCGGCAAGTAA

>Min53MaxCFLuc

ATGGAGGACGCAAAAAACATAAAAAAGGGCCTGCGCCCTTCTATCCTCTCGAGGATGGGACGGCGGGGGA  
GCAGCTCCATAAAGCGATGAAAAGGTACGCACTCGTGCCTGGGACGATAGCGTTACGGATGCACATATAGA  
GGTGAACATAACGTACGCTGAATACTTCGAAATGTCTGTTAGATTGGCTGAAGCTATGAAGAGATACGGCTTG  
AACACTAACACAGAATTGTTGTTTGGCTCTGAAAACCTTTGCAATTCTTCATGCCAGTTTTGGGCGCTTTGTT  
ATTGGCGTTGCTGTTGCTCCAGCTAACGACATTTACAACGAAAGAGAATTGTTGAACTCTATGAACATTTCTCA  
ACCAACTGTTGTTTTCGTTTCTAAGAAGGGCTTGCAAAGATTTTGAACGTTCAAAGAAGTTGCCAATTATTC  
AAAAGATTATTATTATGGACTCTAAGACTGACTACCAAGGCTTCCAATCTATGTACACTTTCGTTACTTCTCACT  
TGCCACCAGGCTTCAACGAATACGACTTCGTTCCAGAATCTTTCGACAGAGACAAGACTATTGCTTTGATTATG  
AACTCTTCTGGCTCTACTGGCTTGCCAAAGGGCGTTGCTTGGCACACAGAAGCTGCTTGCCTTAGATTCTCTCA  
CGCTAGAGACCCAATTTTCGGCAACCAATTATCCAGACACTGCTATTTTGTCTGTTGTTCCATTCCACCACGG  
CTTCGGCATGTTCACTACTTTGGGCTACTTGATTTGCGGCTTCAGAGTTGTTTTGATGTACAGATTGAAGAAG  
AATTGTTCTTGAGATCTTTGCAAGACTACAAGATTCAATCTGCTTTGTTGGTTCCAACCTTTGTTCTTTCTTCGC  
TAAGTCTACTTTGATTGACAAGTACGACTTGTCTAACTTGACGAAATTGCTTCTGGCGGCGCTCCATTGTCTA  
AGGAAGTTGGCGAAGCTGTTGCTAAGAGATTCCACTTGCCAGGCATTAGACAAGGCTACGGCTTGACTGAAA  
CTACTTCTGCTATTTTATTACTCCAGAAGGCGACGACAAGCCAGGCGCTGTTGGCAAGGTTGTTCCATTCTTC  
GAAGCTAAGGTTGTTGACTTGGACTTGGCAAGACTTTGGGCGTTAACCAAAGAGGCGAATTGTGCGTTAGA  
GGCCAATGATTATGTCTGGCTACGTTAAACAACCCAGAAGCTACTAACGCTTTGATTGACAAGGACGGCTGGT  
TGCACTCTGGCGACATTGCTTACTGGGACGAAGACGAACACTTCTCATTGTTGACAGATTGAAGTCTTTGATT  
AAGTACAAGGGCTACCAAGTTGCTCCAGCTGAATTGGAATCTATTTTGTGCAACACCCAAACATTTTCGACGC  
TGGCGTTGCTGGCTTGCCAGACGACGACGCTGGCGAATTGCCAGCTGCTGTTGTTGTTTTGGAACACGGCAA  
GACTATGACTGAAAAGGAAATTGTTGACTACGTTGCTTCTCAAGTTACTACTGCTAAGAAGTTGAGAGGCGGC  
GTTGTTTTCGTTGACGAAGTTCCAAAGGGCTTGACTGGCAAGTTGGACGCTAGAAAGATTAGAGAAATTTGA  
TTAAGGCTAAGAAGGGCGGCAAGTAA

>Min103MaxCFLuc

ATGGAGGACGCAAAAAACATAAAAAAGGGCCTGCGCCCTTCTATCCTCTCGAGGATGGGACGGCGGGGGA  
GCAGCTCCATAAAGCGATGAAAAGGTACGCACTCGTGCCTGGGACGATAGCGTTACGGATGCACATATAGA  
GGTGAACATAACGTACGCGGAGTACTTCGAGATGTGCGGTGCGGCTCGCAGAGGCGATGAAACGGTATGGGC  
TCAATACGAATCACAGGATAGTAGTATGCTCGGAGAACTCGCTCCAGTTCTTTATGCCTGTGCTCGGGGCGCT  
CTTTATAGGGGTGGCAGTGGCGCCAGCTAACGACATTTACAACGAAAGAGAATTGTTGAACTCTATGAACATT  
TCTCAACCAACTGTTGTTTTCGTTTCTAAGAAGGGCTTGCAAAGATTTTGAACGTTCAAAGAAGTTGCCAAT  
TATTCAAAAGATTATTATTATGGACTCTAAGACTGACTACCAAGGCTTCCAATCTATGTACACTTTCGTTACTTC  
TCACTTGCCACCAGGCTTCAACGAATACGACTTCGTTCCAGAATCTTTCGACAGAGACAAGACTATTGCTTTGA  
TTATGAACTCTTCTGGCTCTACTGGCTTGCCAAAGGGCGTTGCTTGGCACACAGAAGCTGCTTGCCTTAGATTC  
TCTCACGCTAGAGACCCAATTTTCGGCAACCAATTATCCAGACACTGCTATTTTGTCTGTTGTTCCATTCCAC  
CACGGCTTCGGCATGTTCACTACTTTGGGCTACTTGATTTGCGGCTTCAGAGTTGTTTTGATGTACAGATTGCA  
AGAAGAATTGTTCTTGAGATCTTTGCAAGACTACAAGATTCAATCTGCTTTGTTGGTTCCAACCTTTGTTCTCTTT  
CTTCGCTAAGTCTACTTTGATTGACAAGTACGACTTGTCTAACTTGACGAAATTGCTTCTGGCGGCGCTCCAT  
TGCTAAGGAAGTTGGCGAAGCTGTTGCTAAGAGATTCCACTTGCCAGGCATTAGACAAGGCTACGGCTTGAC  
TGAAACTACTTCTGCTATTTTATTACTCCAGAAGGGCGACGACAAGCCAGGCGCTGTTGGCAAGGTTGTTCCA  
TTCTTCGAAGCTAAGGTTGTTGACTTGGACTTGGCAAGACTTTGGGCGTTAACCAAAGAGGCGAATTGTGCG  
TTAGAGGCCCAATGATTATGTCTGGCTACGTTAAACAACCCAGAAGCTACTAACGCTTTGATTGACAAGGACGG  
CTGGTTGCACTCTGGCGACATTGCTTACTGGGACGAAGACGAACACTTCTCATTGTTGACAGATTGAAGTCTT

TGATTAAGTACAAGGGCTACCAAGTTGCTCCAGCTGAATTGGAATCTATTTTGTGCAACACCCAAACATTTTC  
GACGCTGGCGTTGCTGGCTTGCCAGACGACGACGCTGGCGAATTGCCAGCTGCTGTTGTTGTTTTGGAACACG  
GCAAGACTATGACTGAAAAGGAAATTGTTGACTACGTTGCTTCTCAAGTTACTACTGCTAAGAAGTTGAGAGG  
CGGCGTTGTTTTCGTTGACGAAGTTCAAAGGGCTTGACTGGCAAGTTGGACGCTAGAAAGATTAGAGAAAT  
TTTGATTAAGGCTAAGAAGGGCGGCAAGTAA

>Min346MaxCFLuc

ATGGAGGACGCAAAAAACATAAAAAAAGGGCCTGCGCCCTTCTATCCTCTCGAGGATGGGACGGCGGGGA  
GCAGCTCCATAAAGCGATGAAAAGGTACGCACTCGTGCCTGGGACGATAGCGTTTACGGATGCACATATAGA  
GGTGAACATAACGTACGCGGAGTACTTCGAGATGTCCGTTGCGGCTCGCAGAGGCGATGAAACGGTATGGGC  
TCAATACGAATCACAGGATAGTAGTATGCTCGGAGAACTCGCTCCAGTTCTTTATGCCTGTGCTCGGGGCGCT  
CTTTATAGGGGTGGCAGTGGCGCCCGCAACGACATATATAATGAGCGGGAGCTCCTCAACTCGATGAACAT  
ATCGCAGCCTACGGTAGTGTGTTGTGTGCAAAAAAGGGCTCCAGAAAATACTCAACGTGCAGAAAAAACTCCCC  
ATAATACAGAAAATAATAATAATGGATTGAAAACGGATTACCAGGGGTTTCAGTCGATGTACACGTTCTGTAA  
CGTCGCATCTCCCTCCCGGTTTAATGAGTACGATTTTGTACCCGAGTCGTTTGATCGGGACAAAACGATAGC  
ACTCATAATGAATTCGTCGGGATCGACGGGGCTCCCTAAAGGGGTGGCACTCCCTCATAGGACGGCATGCGT  
AAGGTTCTCGCATGCAAGGGACCCTATATTTGGGAATCAGATAATACCTGATACGGCGATACTCTCGGTGGTG  
CCCTTCCATCACGGGTTTGGGATGTTTACGACGCTCGGGTATCTCATATGTGGGTTTTCGGGTAGTACTCATGTA  
TAGGTTTGAGGAGGAGCTCTTTCTCCGGTCGCTCCAGGATTACAAAATACAGTCGGCGCTCCTCGTACCCACG  
CTCTTTTCGTTCTTCGAAAATCGACGCTCATAGACAAAATACGATCTCTCGAATCTCCACGAGATAGCGTCGGG  
GGGGGCACCTCTCTCGAAAGAGGTAGGGGAGGCGGTGGCAAAACGGTTCATCTCCCGGGATACGGCAGG  
GGTATGGGCTCACGGAGACGACGTCTGCTATTTTATTACTCCAGAAGGCGACGACAAGCCAGGCGCTGTTG  
GCAAGGTTGTTCCATTCTTGAAGCTAAGGTTGTTGACTTGGACACTGGCAAGACTTTGGGCGTTAACCAAAG  
AGGCGAATTGTGCGTTAGAGGCCCAATGATTATGTCTGGCTACGTTAACAACCCAGAAGCTACTAACGCTTTG  
ATTGACAAGGACGGCTGGTTGCACTCTGGCGACATTGCTTACTGGGACGAAGACGAACACTTCTTCATTGTTG  
ACAGATTGAAGTCTTTGATTAAGTACAAGGGCTACCAAGTTGCTCCAGCTGAATTGGAATCTATTTTGTGCAA  
CACCCAAACATTTTCGACGCTGGCGTTGCTGGCTTGCCAGACGACGACGCTGGCGAATTGCCAGCTGCTGTTG  
TTGTTTTGGAACACGGCAAGACTATGACTGAAAAGGAAATTGTTGACTACGTTGCTTCTCAAGTTACTACTGCT  
AAGAAGTTGAGAGGCGCGTTGTTTTCGTTGACGAAGTTCAAAGGGCTTGACTGGCAAGTTGGACGCTAGA  
AAGATTAGAGAAATTTTGATTAAGGCTAAGAAGGGCGGCAAGTAA

>Max346MinCFLuc

ATGGAAGACGCTAAGAACATTAAGAAGGGCCAGCTCCATTCTACCCATTGGAAGACGGCACTGCTGGCGAA  
CAATTGCACAAGGCTATGAAGAGATACGCTTTGGTTCCAGGCACTATTGCTTTCACTGACGCTCACATTGAAGT  
TAACATTACTTACGCTGAATACTTCGAAATGTCTGTTAGATTGGCTGAAGCTATGAAGAGATACGGCTTGAAC  
ACTAACCACAGAATTGTTGTTTCTCTGAAAACCTTTTCAATTCTTCATGCCAGTTTTGGGCGCTTTGTTTCATT  
GGCGTTGCTGTTGCTCCAGCTAACGACATTTACAACGAAAGAGAATTGTTGAACTCTATGAACATTTCTCAACC  
AACTGTTGTTTTCGTTTCTAAGAAGGGCTTGCAAAGATTTTGAACGTTCAAAGAAGTTGCCAATTATTCAA  
AGATTATTATTATGGACTCTAAGACTGACTACCAAGGCTTCCAATCTATGTACACTTTTCGTTACTTCTCACTTGC  
CACCAGGCTTCAACGAATACGACTTCGTTCCAGAATCTTTGACAGAGACAAGACTATTGCTTTGATTATGAAC  
TCTTCTGGCTCTACTGGCTTGCCAAAGGGCGTTGCTTTGCCACACAGAAGCTTGGCTTAGATTCTCTCACGC  
TAGAGACCCAATTTTCGGCAACCAAATTATCCAGACACTGCTATTTTGTCTGTTGTTCCATTCCACCACGGCTT  
CGGCATGTTCACTACTTTGGGCTACTTGATTTGCGGCTTCAGAGTTGTTTTGATGTACAGATTGGAAGAAGAA  
TGTTCTTGAGATCTTTGCAAGACTACAAGATTCAATCTGCTTTGTTGGTTCCAATTTGTTCTTTCTTCGCTAA



GTCTACTTTGATTGACAAGTACGACTTGTCTAACTTGCACGAAATTGCTTCTGGCGGCGCTCCATTGTCTAAGG  
AAGTTGGCGAAGCTGTTGCTAAGAGATTCCACTTGCCAGGCATTAGACAAGGCTACGGCTTGACTGAAACGA  
CGTCGGCGATACTCATAACGCCCGAGGGGGATGATAAACCTGGGGCGGTAGGGAAAGTGGTGCCTTTTTTG  
AGGCGAAAGTGGTGGATCTCGATACGGGGAAAACGCTCGGGGTGAATCAGAGGGGGGAGCTCTGTGTAAG  
GGGGCCTATGATAATGTCGGGGTATGTAAACAATCCTGAGGCGACGAACGCACTCATAGACAAAGATGGGTG  
GCTCCATTCGGGGGACATAGCGTACTGGGACGAGGACGAGCACTTCTTCATAGTGGACCGGCTCAAATCGCT  
CATAAAATACAAAGGGTATCAGGTGGCACCCGCGGAGCTCGAGTCGATACTCCTCCAGCACCCCAACATATTC  
GACGCGGGGGTGGCAGGGCTCCCCGACGATGACGCAGGGGAGCTCCCCGAGCAGTGGTGGTGTCTCGAGCA  
CGGGAAAACGATGACGGAGAAAGAGATAGTGGATTACGTAGCATCGCAGGTAACGACGGCGAAAAAACTCC  
GGGGGGGGTGGTGTGGTGGACGAGGTACCTAAAGGGCTCACGGGGAACTCGACGCAAGGAAAATAAG  
GGAGATACTCATAAAAGCAAAAAAGGGGGGAAATAA

>minHIS3

ATGACAGAGCAGAAGGCACTCGTAAAGAGGATAACAAATGAGACAAAGATACAGATAGCAATATCGCTCAA  
GGGGGGCCTCTCGCAATAGAGCACTCGATATCCCTGAGAAGGAGGCAGAGGCAGTAGCAGAGCAGGCAA  
CACAGTCGCAGGTAATAAATGTACACACAGGGATAGGGTTCCTCGATCACATGATACACGCACTCGCAAAGCA  
CTCGGGGTGGTCTCATAGTAGAGTGCATAGGGGATCTCCACATAGATGATCACCACACAACAGAGGATTG  
CGGGATAGCACTCGGGCAGGCATTCAAGGAGGCACTCGGGGCAGTAAGGGGGGTAAAGAGGTTTCGGGTCCG  
GGTTCGCACCTCTCGATGAGGCACTCTCGAGGGCAGTAGTAGATCTCTCGAATAGGCCTTATGCAGTAGTAG  
AGCTCGGGCTCCAGAGGGAGAAGGTAGGGGATCTCTCGTGCAGATGATACCTCACTTCTCGAGTCGTTCCG  
CAGAGGCATCGAGGATAACACTCCACGTAGATTGCCTCAGGGGAAGAATGATCACCACAGGTCGGAGTCG  
GCATTCAAGGCACTCGCAGTAGCAATAAGGGAGGCAACATCGCCTAATGGGACAAATGATGTACCTTCGACA  
AAGGGGGTACTCATGTATCCTTATGATGTACCTGATTATGCATAG

>staHIS3

ATGACAGAGCAGAAAGCCCTAGTAAAGCGTATTACAAATGAAACCAAGATTCAGATTGCGATCTCTTTAAAGG  
GTGGTCCCCTAGCGATAGAGCACTCGATCTTCCAGAAAAAGAGGCAGAAGCAGTAGCAGAACAGGCCACAC  
AATCGCAAGTGATTAACGTCCACACAGGTATAGGGTTTCTGGACCATATGATACATGCTCTGGCCAAGCATT  
CGGCTGGTCTAATCGTTGAGTGCATTGGTACTTACACATAGACGACCATCACACCACTGAAGACTGCGGG  
ATTGCTCTCGGTCAAGCTTTTAAAGAGGCCCTAGGGGCCGTGCGTGGAGTAAAAAGGTTTGGATCAGGATTT  
GCGCCTTTGGATGAGGCACTTTCCAGAGCGGTGGTAGATCTTTCGAACAGGCCGTACGCAGTTGTCGAACTTG  
GTTTGCAAAGGGAGAAAGTAGGAGATCTCTTTCGAGATGATCCCGCATTTTCTTGAAAGCTTTGCAGAGGC  
TAGCAGAATTACCTCCACGTTGATTGTCTGCGAGGCAAGAATGATCATCACCGTAGTGAGAGTGCCTTCAAG  
GCTCTTGCAGTTGCCATAAGAGAAGCCACCTCGCCAATGGTACCAACGATGTTCCCTCCACCAAGGTGTTCT  
TATGTACCCGTACGACGTCCCGGACTACGCGTAG

>maxHIS3

ATGACTGAACAAAAAGCGTTGGTCAAAGAATTACTAACGAACTAAAATTCAAATTGCGATTTCTTGAAAG  
GTGGTCCGTTGGCGATTGAACATTCCATTTTTCCGAAAAAGAAGCGGAAGCGGTGCGGGAACAAGCGACTC  
AATCCCAAGTCATTAACGTCCATACTGGTATTGGTTTTTTGGACCATATGATTCATGCGTTGGCGAAACATTCC  
GGTTGGTCTTGATTGTGCAATGTATTGGTACTTGCATATTGACGACCATCATACTACTGAAGACTGTGGTAT  
TGCGTTGGGTCAAGCGTTTAAAGAAGCGTTGGGTGCGGTGAGAGGTGTCAAAGATTTGGTTCCGGTTTTGC  
GCCGTTGGACGAAGCGTTGTCCAGAGCGGTGTCGACTTGTCCAACAGACCGTACGCGGTGTCGAATTGGG  
TTTGCAAAGAGAAAAAGTCGGTGACTTGTCTGTGAAATGATTCCGCATTTTTTTGGAATCCTTTGCGGAAGCG

TCCAGAATTACTTTGCATGTCGACTGTTTGAGAGGTAAAAACGACCATCATAGATCCGAATCCGCGTTTAAAG  
CGTTGGCGGTGCGGATTAGAGAAGCGACTTCCCCGAACGGTACTAACGACGTCCCGTCCACTAAAGGTGTCTT  
GATGTACCCGTACGACGTCCCGGACTACGCGTAG

>minRLuc

ATGACATCGAAGGTATATGATCCTGAGCAGAGGAAGAGGATGATAACAGGGCCTCAGTGGTGGGCAAGGTG  
CAAGCAGATGAATGTACTCGATTGTTTATAAATTATTATGATTTCGGAGAAGCACGCAGAGAATGCAGTAATA  
TTCCTCCACGGGAATGCAGCATCGTCGTATCTCTGGAGGCACGTAGTACCTCACATAGAGCCTGTAGCAAGGT  
GCATAATACCTGATCTCATAGGGATGGGGAAGTCGGGGAAGTCGGGGAATGGGTTCGTATAGGCTCCTCGATC  
ACTATAAGTATCTCACAGCATGGTTCGAGCTCCTCAATCTCCCTAAGAAGATAATATTCGTAGGGCAGATTGG  
GGGGCATGCCTCGCATTCCACTATTCGTATGAGCACCAGGATAAGATAAAGGCAATAGTACACGCAGAGTCG  
GTAGTAGATGTAATAGAGTCGTGGGATGAGTGGCCTGATATAGAGGAGGATATAGCACTATAAAGTCGGA  
GGAGGGGGAGAAGATGGTACTCGAGAATAATTTCTTCGTAGAGACAATGCTCCCTCGAAGATAATGAGGAA  
GCTCGAGCCTGAGGAGTTCGAGCATATCTCGAGCCTTTCAAGGAGAAGGGGGAGGTAAGGAGGCCTACAC  
TCTCGTGGCCTAGGGAGATACCTCTCGTAAAGGGGGGGAAGCCTGATGTAGTACAGATAGTAAGGAATTATA  
ATGCATATCTCAGGGCATCGGATGATCTCCCTAAGATGTTTCATAGAGTCCGATCCTGGGTTCTTCTCGAATGCA  
ATAGTAGAGGGGGCAAAGAAGTTCCTAATACAGAGTTCGTAAAGGTAAGGGGCTCCACTTCTCGCAGGAG  
GATGCACCTGATGAGATGGGGAAGTATATAAAGTCGTTTCGTAGAGAGGGTACTCAAGAATGAGCAGATGTC  
GTAA

>staRLuc

ATGACTTCGAAAGTTTATGATCCAGAACAAAGGAAACGGATGATAACTGGTCCGCAGTGGTGGGCCAGATGT  
AAACAAATGAATGTTCTTGATTCATTTATTAATTATTATGATTTCAGAAAAACATGCAGAAAATGCTGTTATTTT  
TTACATGGTAACGCGGCCTCTTCTTATTTATGGCGACATGTTGTGCCACATATTGAGCCAGTAGCGCGGTGTAT  
TATACCAGACCTTATTGGTATGGGCAAATCAGGCAAATCTGGTAATGGTTCCTTATAGGTTACTTGATCATTACA  
AATATCTTACTGCATGGTTTGAACCTTCTTAATTTACCAAAGAAGATCATTTTTGTCCGCCATGATTGGGGTGCTT  
GTTTGGCATTTCATTATAGCTATGAGCATCAAGATAAGATCAAAGCAATAGTTCACGCTGAAAGTGTAGTAGA  
TGTGATTGAATCATGGGATGAATGGCCTGATATTGAAGAAGATATTGCGTTGATCAAATCTGAAGAAGGAGA  
AAAAATGGTTTTGGAGAATAACTTCTTCGTGGAAACCATGTTGCCATCAAAAATCATGAGAAAGTTAGAACCA  
GAAGAATTTGCAGCATATCTTGAACCATTCAAAGAGAAAGGTGAAGTTCGTGTCACCAATTATCATGGCCTC  
GTGAAATCCCGTTAGTAAAAGGTGGTAAACCTGACGTTGTACAAATTGTTAGGAATTATAATGCTTATCTACGT  
GCAAGTGTGATTTACCAAAAATGTTTATTGAATCGGACCCAGGATTCCTTTCCAATGCTATTGTTGAAGGTGC  
CAAGAAGTTTCTAATACTGAATTTGTCAAAGTAAAAGGTCTTCATTTTTCGCAAGAAGATGCACCTGATGAAA  
TGGGAAAATATATCAAATCGTTCGTTGAGCGAGTTCTCAAAAATGAACAAATGTCGTAA

>mCherryv3

ATGGTTTCAAAGGGCGAAGAAGACAATATGGCTATTATTAAGGAATTCATGAGATTTAAAGTTCATATGGAG  
GGTAGTGTAAACGGTCACGAATTCGAAATCGAAGGAGAAGGTGAAGGTAGACCATACGAGGGTACCCAAAC  
TGCTAAGTTGAAAGTCACAAAGGGTGGGCCTTTACCATTTGCCTGGGACATTTTGTCTCCACAATTCATGTATG  
GTTCCAAAGCTTACGTGAAGCATCCTGCAGATATCCCAGATTATCTAAAATTGCTTTTTCCAGAAGGTTTCAAG  
TGGGAAAGGGTTATGAATTTTGAAGACGGTGGTGTGTAACCGTTACTCAAGATTCATCTTTACAGGATGGCG  
AATTCATATACAAAGTCAAGTTGAGAGGTACGAACTTCCCCTCCGACGGTCCAGTTATGCAAAAAAAGACCAT  
GGGTTGGGAGGCCTTAGCGAAAGAATGTATCCAGAAGATGGTGCTCTGAAAGGAGAAATCAAGCAACGTTT  
GAAATTAAGGATGGTGGTCACTACGACGCTGAAGTTAAAACACTACATATAAGGCCAAAAAGCCTGTCCAATTG

CCAGGTGCATACAACGTTAATATTAAGCTTGATATCACCTCTCATAACGAAGATTATACTATTGTCGAGCAATA  
CGAAAGAGCTGAAGGTAGACTCCACTGGCGGTATGGACGAATTGTACAAGTAA

>mCherryv4

ATGGTTTCAAAGGGCGAAGAAGACAATATGGCTATTATTAAGGAATTCATGAGATTCAAGGTCCACATGGAA  
GGTTCTGTCAACGGTCACGAATTCGAAATTGAAGGTGAAGGTGAAGGTAGACCATACGAAGGTACCCAAACC  
GCTAAGTTGAAGGTCACCAAGGGTGGTCCATTGCCATTCGCTTGGGATATTTTGTCTCCACAATTCATGTACGG  
TTCTAAGGCTTACGTCAAGCACCCAGCTGATATTCCAGATTACTTGAAGTTGTCTTTCCAGAAGGTTTCAAGT  
GGGAAAGAGTCATGAACTTCGAAGATGGTGGTGTCTGTCACCGTCACCCAAGATTCTTCTTTGCAAGATGGTGA  
ATTCATTTACAAGGTCAAGTTGAGAGGTACCAACTTCCCATCTGATGGTCCAGTCATGCAAAAAGAAGACCATG  
GGTTGGGAAGCTTCTTCTGAAAGAATGTACCCAGAAGATGGTGTCTTGAAGGGTCAAATTAAGCAAAGATTG  
AAGTTGAAGGATGGTGGTCACTACGATGCTGAAGTCAAGACCACCTACAAGGCTAAGAAGCCAGTCCAATTG  
CCAGGTGCTTACAACGTCAACATTAAGTTGGATATTACCTCTCACAACGAAGATTACACCATTGTCTGAACAATA  
CGAAAGAGCTGAAGGTAGACTCTACCGGTGGTATGGATGAATTGTACAAGTAA

# Firefly Luciferase (CFLuc) codon variants: codon substitutions and resulting decoding speed changes

max  
sta  
min

faster **16x**

no change

**16x** slower

Fold speed change compared to staCFLuc

ATGGAAGACGCTAAGAACAATTAAAGAGGGCCAGCTCCATTTCTACCCATTGGAAACGACGGCACTGCTGGCGAAACAATTGCACAAGGCTATGAAGAGATACGCTTTGGTTCCAGGCACATTGCTTTCACTGACGCTCACATTGAAATTAAAC  
ATGGAAGACGCCAAAAACATAAAGAAAGGCCCGGCCCATTTCTATCCTCTAGAGGATGGAACCGCTGGAGAGCAACTGCATAAGGCTATGAAGAGATACGCTTGGTTCCAGGCACAAATTGCTTTTACAGATGCACATATCGAGGTGAAC  
ATG**GAG**GACGCAAAAAACATAAAAAAGGG**CCT**TCGCGCCCTTCTATCCTCTCGAGGATGGGACGGCGGGGAG**CAGCTC**CATAAAGCGATGAA**AGG**TACGCACCTCGTCCCTGGGACG**ATA**CGCTTACGGATGCACAT**ATA**GAGGTGAAC

150

ATTACTTACGCTGAATACTTTCGAAATGTCTGTT**AGG**TTGGCTGAAGCTATGAAGAGATACGGCTTGAACACTAACCACAGAATTGTT**GT**TTGCTCTGAAAACCTTT**TTG**CAATTCTTTCATGCCAGTTTGGGCGCTTTGTTCACTTGGCGTT  
ATCAGCTACGGGAATCACTTTCGAAATGTCCGTTCCGTTGGCAGAAGCTATGAACCGATATGGGCTGAATACAAATCACAGAATCGTCTGATGCAGTGAACCTCTCTTCAATTCTTATGCGCGTGTGGGCGCTTATTTATCGGAGTT  
**ATA**ACGTACGGCG**GAG**TACTT**CAG**AT**TCG**GTGCG**CTC**GC**AG**CGCATGAACGGTATGGG**CT**CAATACGAATCAC**AGG**ATAGTAGTATGCT**CG**G**AG**ACT**TCG**CT**CAG**TTCTTTATG**CCT**GTG**CT**CGGGCG**CTC**TTTATAGGGGTG

300

GCTGTTGCTCCAGCTAACGACATTTACAACGAAAGAGAATTG**TTG**AACTCTATGAACATT**CTCAA**CCA**ACT**GT**TT**GTTTTCGTTTCTAAGAAGGGCTTGCAAAAGATTTTGAACGTTCAAAAGAAGTTGCCAATTATT**CAA**AAGATTATT  
GCAGTTGGCCCCGCAACGACATTTATAATGAACGTGAATTGCTCAACAGTATGAACATTTTCGCAGCTACCGTAGTGT**TTG**TTTCCAAAAGGGGTTGCAAAAAATTTGAACGTGCAAAAAAATACCAATAATCCAGAAAATATT  
GCAGTGGCCCCGCAACGAC**ATA**TATAAT**GAG**CGG**GAGCTC**CTCAACTCGATGAACAT**ATA**TCGCAGCTACGGTAGTGT**TTG**TT**TCG**AAAAAGGG**CTCCAG**AAA**ACTC**CAACGTG**CAG**AAAA**CTCCCA**ATA**ATAC**AGAAA**ATAATA**

450

ATTATGGACTCTAAGACTGACTAC**CAA**GGCTT**CAATCT**ATGTACACTTTCGTTACTTCTCACTTGGCCACAGGCTTCAACGAATACGACTT**CTT**CCA**GAA**TCTTTTCGACAGAGACAAGACTATTGCTTTGAT**TAT**GAACTCTTCTGGC  
ATCATGGATTCTAAAACGGATTACCAGGGATTTCAGTCGATGTACACGTTTCGTACATCTCATCTACCTCCCGGTTTTAATGAATACGATTTTGTACCAGAGTCTTTGATCGTGACAAAAAATGCAGTATAATGAATCTCTCGGA  
**ATA**ATGGAT**TCG**AAAACGGATTACCAGGGTTTCAGTCGATGTACACGTT**CTA**AG**TCG**CATCTCCCTCCCGGTTTTAAT**GAG**TACGATTTTGTACCAG**TCG**TTT**GAT**CGGGACAAAACGAT**AGC**ACTCATAATGAAT**TCGTC**GGAA

600

TCTACTGGCTTGCCAAAGGGCGTTGCTTTG**CC**CACACAGA**ACT**GCTTGGCTTAGATT**CTC**TACGCTAGAGAC**CCA**ATTTTCGGCAACCAAATATTCCAGACACTGCTATTTTGTCTGTTGTTCCATTCCACCACGGCTTGGC**AT**GTTC  
TCTACTGGGTTACCTAAGGGTGTGGCCCTTCCGCATAGA**ACT**GCCTGCGTCAGATTCTCGCATGCCAGAGATCCTATTTTGGCAATCAAATCATTCCGGACTGCGATTTAAGTGTGTTCCATTCCATCACGGTTTTGGAA**T**GT**TT**  
**TCG**ACGGGG**CTC**CCTAAAGGGTGGCACT**CCT**CAT**AGG**ACGGCATGC**GTAAG**TTCTCGCATGCA**AGG**GACCT**ATA**TTTGGAA**T**CAGATA**ATA****CCT**GATACGGG**ATA**ACTCTCGGTGGTGGCCCTTCCATCACGGTTTTGGGATGT**TT**

750

ACTACT**TT**CGGGCTACTT**GAT**TTGGGGTTCAGAGTTGTTTGGATGTACAGATTGCAAGAA**GAA**TTGTTCTTGAGATCTTTG**CAA**GACTACAAGATTCAATCTGCTTTGTTGGTTCCA**ACT**TTGTT**CTC**TTCTTCGCTAAGTCTACTTTG  
ACTACACTCGGATATTGATATGTGGATTTTCAGTCTGCTTAATGTATAGATTTGAAGAAGAGCTGTTTTTACGATCCCTTCAGGATTACAAAATCAAAGTGCCTGCTAGTACCAACCTATTTTCACTCTTCGCCAAAAGCCTG  
ACGACGCTCGGGTAT**CTC**ATATGTGGTTTTCGGGTAGTACTCATGTAT**AGG**TTT**GAGGAG**GAGCTTT**CT**CGG**TCG**CTCCAGGATTACAAA**ATACAG**TCGGCG**CTC**CTCGTACCACGCTCTTTCTGTTCTTCGCAAAATCGACGCT**C**

900

ATTGACAAGTACGACTTGTCTAACTTGCACGAAATGCTTCTGGGGCGCTCCAT**TTG**CTAAGGAAGTTGGCGAAGCTGTTGCTAAGAGATCCACTTGGCCAGGCATTAGACAAGGCTACGGCT**TC**ACT**GAA**ACTACTTCTGCTATTTTG  
ATTGACAATAACGATTTATCTAATTTACACGAAATGCTTCTGGGGCGCACCTCTTTGAAAGAAGTGGGGAAGCGGTTGCAAAACGCTTCCATCTCCAGGGATACGACAAGGATATGGGCTCACTGAGACTACATCAGCTATTCTG  
**ATA**GACAATAACGAT**CTCTC**GAAT**CTC**CAC**GAG**ATAGCG**TCG**GGGGGGCACCTCTCTCGAAA**GAG**GTAGGG**GAG**CGGTTGGCAAAA**CGG**TTCCATCTCCCGGGATACGG**CAG**GGGTATGGGCTCACGGAGACGCTCGGCG**ATACTC**

1050

ATTACTCCAG**GAA**GGCGACGACAAGCCAGGGCTGTTGGCAAGGTTGTTCCATTCTTCGAAGCTAAGGTTGTTGACTTGGACACTGGCAAGACTTTGGGCGTTAAC**CAA**AGAGGGCAATTGTGCGTTAGAGGGCC**CA**TGATTATGCTGGC  
ATTACACCCGAGGGGGATGATAAA**CCT**GGGGCGGTAGGGAAAGTGGTGCCTTTTT**GAG**CGGAAAGTGGTGGAT**CTC**GATACGGGAAAACGCTCGGGGTGAATCAG**AGG**GGG**GAGCTC**TGT**GTA**AGG**GG**GCCTATGATA**ATG**TCGGGG  
**ATA**ACGCCCGAGGGGGATGATAAA**CCT**GGGGCGGTAGGGAAAGTGGTGCCTTTTT**GAG**CGGAAAGTGGTGGAT**CTC**GATACGGGAAAACGCTCGGGGTGAATCAG**AGG**GGG**GAGCTC**TGT**GTA**AGG**GG**GCCTATGATA**ATG**TCGGGG

1200

TAC**GT**TTAACAACCCAGAAGCTACTA**AC**CGCTTTGATTGACAAGGACGGCTGGTTGCACTCTGGCGAC**ATT**GCTTACTGGGACGAAGACGAACACTTCTT**CA**TT**GTT**GACAGATTGAAGTCTTTGATTAAAGTACAAGGGCTAC**CAA**GT**TT**GTCT  
TATGTAACAATCCGGAAAGCGACCAACGCCTT**GAT**TGACAAGGATGGATGGCTACATTCTGGAGACATAGCTTACTGGACGAAGACGAACACTTCTT**CAT**AGTTGACCGCTTGAAGTCTTTAATTAATAACAAGGATATCAGGTGGCC  
TATGTAACAAT**CCT**GAGGCGACGAACGC**CTC**ATA**GACA**AAAGATGGGTGGCTCCAT**TCG**GGGGACATAGCGTACTGGGAC**GAG**GAC**GAG**CACTTCTT**CAT**AGTTGACCG**CTCAA**AT**TCG**CT**ATA**AAAATACAAGGGTATCAGGTGGCA

1350

CCAGCTGAATTGGAA**CT**ATTTTGGTGAACACCCAAACATTTTCGACGCTGGCGTTGCTGGCTTGGCCAGACGACGACGCTGGCGAATTGGCCAGCTGCTGTTGTTGTTTGG**GAA**CACGGCAAGACTATGACTGAAAAG**GAA**ATTGTTGAC  
CCCGCTGAATTGGAAATCGATATTGTTACAACACCCCAACATCTTCGACGCGGGCGTGGCAGGTTCTCCGACGATGACGCGGTTGA**ACT**CTCCCGCCCGTGTGTTGTTTGGAGCACGGAAAGACGATGACGGAAAAGAGATCGTGGAT  
CCCGCG**GAGCTCG**ACTCGATA**CTC**CT**CAG**CACCCCAAC**AT**ATTTCGACGCGGGGGTGGCAGGGCTCCCGACGATGACG**CAGGG**GAG**CT**CCCCGACGAGTGGTGGT**CTC**GAGCACGGGAAAACGATGACG**GAG**AAAAGAG**ATA**GTGGAT

1400

TACGTTGCTTCTCAA**GT**TACTACTGCTAAGAAGTTGAGAGGGCGGTTGTTTTGTTGACGA**ATT**CCAAAGGGCTT**GACT**GGCAAG**TTG**GACGCTAGAAAGATTAG**GAA**ATT**TTG**ATTAAAGGCTAAGAAGGGCGGCAAGTAA  
TACGTCGCCAGTCAAGTAACAACCGCAAAAAGTTGCGCGGAGGAGTTGTTGTTTGGACGAAGTACC**GAA**AGGCTTACC**GAA**AACTCGACGCAAGAAAATCAGAGAGATCCTCATAAAGGCCAAGAAGGGCGGAAAGTAA  
TAC**GTA**GCAT**CG**CAGTAACGACGGCGAAAA**CTC**CGGGGGGGTGGTGT**TTG**TGGAC**GAG**GTA**CCT**AAAGGGCTCACGGGAAACTCGACGCA**AGG**AAA**ATA**AGGAGAT**ACT**CATAAAGCAAAAAGGGGGAAATAA

1544

# HIS3 codon variants: codon substitutions and resulting decoding speed changes

faster 16x no change 16x slower

Fold speed change compared to staHIS3

maxHIS3

staHIS3

minHIS3

ATGACTGAAACAAAAAGCGTTGGTCAAAAGAATTACTAACGAAACTAAAATTCAAATTGCGATTTCCTTGAAAGGTGGTCCGTTGGCGATTGAAATCCATTTCCATTTTCCGAAAAAGAGCGGAAGCGGTCCGGAAACAAGCGACTCAATCC  
ATGACAGAGCAGAAAAGCCCTAGTAAAGCGTATTACAAATGAAACCAAGATTCAGATTGCGATCTCTTTAAAGGTGGTCCCTAGCGATAGAGCACTCGATCTTCCAGAAAAAGAGCGAAGCAGTAGCAGAACAGGCCACACAATCG  
ATGACAGAGCAGAAAGCACTCGTAAAGAGGATAACAAATGAGACAAAGATAACAGATAGCAATAACGCTCAAGGGGGGCCTCAGCAATAGAGCACTCGATATTCCCTGAGAAGGAGGCAAGGCAGTAGCAAGCAGGCAACAAGTCC

150

CAAGTCATTAACGTCCATACTGGTATTGGTTTTTTGGACCATATGATTATGCGTTGGGAAACATTCCGGTTGGTCCCTTGATGTGCAATGTATTGGTGACTTGCATATTGACGACCATCATACTACTGAAGACTGTGGTATTGCGTTG  
CAAGTGATTAACGTCCACACAGGTATAGGGTTTTCTGGACCATATGATACATGCTCTGGCCAAGCATTCCGGCTGGTCGCTAATCGTTGAGTGCATTGGTGACTTACACATAGACGACCATCACACCACTGAAGACTGCGGGATTGCTCTC  
CAGGTAATAAATGTAACACACAGGGATAGGGTTCTCGATCACATGATACACGCACTCGCAAAGCACTCGGGGTGGTCGCTCATAGTAGAGTGCATAGGGGATCTCCACATAGATGATCACCACACAACAAGGATTGCGGGATAGCACTC

300

GGTCAAGCGTTTAAAGAAAGCGTTGGGTGCGGTGAGAGGTGCAAAAGTTTGGTTCCGGTTTTGCGCCGTTGGACGAAGCGTTGTCCAGAGCGGTGCTCGACTTGTCCAAACGACCGTACGCGTTCGTCGAATTGGGTTTGCAAGAGAA  
GGTCAAGCTTTTAAAGAGCCCTAGGGCCGTGCGTGGAGTAAAAGGTTTGGATCAGGATTTGCGCCTTTGGATGAGGCACCTTCCAGAGCGGTGGTAGATCTTTTCAACAGGCCGTACGCAGTTGTCGAACTTGGTTTGCAAGGGAG  
GGGCAGGCATTCAAGGAGGCACTCGGGGCAGTAAGGGGGTAAAGAGGTTCCGGTCCGGGTTCCCACTCTCGATGAGGCACCTCCAGCGGAGTAGTAGATCTCTCGAATAGGCCTTATGCAGTAGTAGAGTCGGGCTCCAGGGAG

450

AAAGTCGGTGACTTGCCTGTGAAATGATTCCGCATTTTTTGGAATCCTTTCCGGAAGCGTCCAGAATTACTTTGCATGTCGACTGTTTGGAGGTTAAAACGACCATCATAGATCCGAATCCGCGTTTAAAGCGTTGGCGGTCCGGATT  
AAAGTAGGAGATCTCTTTGCGAGATGATCCCGATTTTTCTTGAAGCTTTGCAGAGGCTAGCAGAATTACCTTCCACGTTGATTGTCTGCGAGGCAAGAATGATCATCACCGTAGTGAGAGTGCCTTCAAGGCTTTGCGGTTGCCATA  
AAGGTAGGGGATCTCTCGTGCAGATGATACCTCACTTCCTCAGTCGTTCCGAGAGGCATCGAGGATAACACTCCACGTAGATTGCCTCAGGGGGAAGAATGATCACCACAGGTCGGAGTCGGCAATCAAGGCACTCCAGTAGCAATA

600

AGAGAAGCGACTTCCCGAACCGTACTAACGACGTCCCGTCCACTAAAGGTGTCTTGATGTACCCGTACGACGTCCCGGACTACGCGTAG  
AGAGAAGCCACCTCGCCAATGGTACCAACGATGTCCCTCCACCAAGGTGTTCTTATGTACCCGTACGACGTCCCGGACTACGCGTAG  
AGGGAGGCAACATCGCTAATGGGCAAAATGATGTACCTTCGACAAAGGGGTACTCATGTATCCTTATGATGTACCTGATTATGCATAG

690

# RLuc codon variants: codon substitutions and resulting decoding speed changes

faster **16x** no change **16x** slower

Fold speed change compared to staRLuc

staRLuc  
minRLuc

ATGACTTCGAAAGTTTATGATCCAGAACAAAGGAAACGGATGATAACTGGTCCGAGTGGTGGCCAGATGTAACAAATGAATGTTCTTGATTCATTTATTAATTATTATGATTCAGAAAAACATGCAGAAAATGCTGTATTTTTTTA  
ATGACATCGAAGGTAATGATCCTGAGCAGAGGAAGAGGATGATAACAGGGCCTCAGTGGTGGGCAAGCTGCAAGCAGATGAATGTACTCGATTCGTTTATAAATTATTATGATTCGAGAAGCACGCAAGAAAATGACTTCGAAAGTTT

150

CATGGTAACGCGGCCTCTTCTTATTTATGGCGACATGTTGTGCCACATATTGAGCCAGTAGCGGGTGTATTATACCAGACCTTATTGGTATGGGCAAATCAGGCAAATCTGGTAATGGTTCTTATAGGTTACTTGATCATTACAAATAT  
CACGGGAATGCAGCATCGTCTATCTCTGGAGGCACGTAATACCTCACATAGAGCCTGTAGCAAGGTGCATAATACCTGATCTCATAGGGATGGGAAGTCGGGAAGTCGGGAATGGTTCGTATAGGCTCCTCGATCACTATAAGTAT

300

CTTACTGCATGGTTTGAACCTCTTAATTTACCAAGAAGATCATTTTTTGTCGGCCATGATGGGGTCTTGTTTGGCATTTCATTATAGCTATGAGCATCAAGATAAGATCAAAGCAATAGTTTACGCTGAAAGTGTAGTAGATGTATT  
CTCACAGCATGGTTCGACCTCCTCAATCTCCCTAAGAAGATAATATTCTAGGGCACGATTGGGGGCATGCCCTCGCATTCCTACTATTCGTATGAGCACAGGATAAGATAAAGGCAATAATACACGCAAGCTCGGTAGTAGATGTAATA

450

GAATCATGGGATGAATGGCCTGATATTGAAGAAGATATTGCGTTGATCAAATCTGAAGAAGGAGAAAAATGGTTTTGGAGAATAACTTCTTCGTGGAAACCATGTTGCCATCAAAAAATCATGAGAAAGTTAGAACCAGAAGAAATTTGCA  
GAGTCGTGGGATGAGTGGCCTGATATAGAGGAGGATATAGCACTCATAAAGTCGGAGGAGGGGAGAGAAGTGTACTCGAGAATAATTTCTCGTAGAGACAATGCTCCCTCGAAGATAATGAGCAAGCTCGAGCCTGAGGAGTTTCGCA

600

GCATATCTTGAACCATTCAAAGAGAAAGGTGAAGTTCGTGTCACACATTATCATGGCCTCGTGAATCCCGTTAGTAAAAGGTGGTAAACCTGACGTTGTACAAATGTTAGGAATTATAATGCTTATCTACGTGCAAGTGTATGATTTA  
GCATATCTCGAGCCTTCAAGGAGAAGGGGAGGTAAGGAGGCCACACTCTCGTGGCCTAGGAGATACCTCTCGTAAAGGGGGGAAAGCCTGATGTAGTACAGATAGTAAGGAATTATAATGCATATCTCAGGCATCGGATGATCTC

750

CCAAAAATGTTTATTGAATCGGACCCAGGATTCCTTTCCAATGCTATTGTTGAAGGTGCCAAGAAGTTTCCCTAATACTGAATTTGTCAAAGTAAAAGGTCTTCATTTTTCGCAAGAAGATGCACCTGATGAAATGGGAAAAATATATCAAA  
CCTAAGATGTTATAGAGTCCGATCCTGGGTTCTTCTCGAATGCAATAGTAGAGGGGGCAAAGAAGTTCCCTAATACAGAGTTCGTAAGGTAAAGGGGTCACCTTCTCGCAGGAGATGCACCTGATGAGATGGGGAAGTATATAAAG

900

TCGTTTCGTTGAGCGAGTTCTCAAAAATGAACAAATGTCGTAA  
TCGTTTCGTAGAGGGTACTCAAGAATGAGCAGATGTCGTAA

942

# mCherry codon variants: codon substitutions and resulting decoding speed changes

faster **16x** no change **16x** slower

Fold speed change compared to mCherryv3

mCherryv3

mCherryv4

ATGGTTTCAAAGGGCGAAGAAGACAATATGGCTATTATTAAGGAATTCATGAGATTTAAAGTTTCATATGGAGGGTAGTGTAAACGGTCACGAATTCGAAATCGAAGGAGAAGGTGAAGGTAGACCATACGAGGGTACCCAAACTGCTAAG  
ATGGTTTCAAAGGGCGAAGAAGACAATATGGCTATTATTAAGGAATTCATGAGATTCGAGGTTCCACATG**GAA**GGTTCGTCAACGGTCACGAATTCGAAATGAAGGTGAAGGTAGACCATAC**GAA**GGTACCCAAACCGCTAAG

150

TTGAAAGTCACAAAGGGTGGGCTTTACCATTTCCTGGGACATTTTGTCTCCACAATTCATGTATGGTTCCAAAGCTTACGTGAAGCATCCTGCAGATATCCAGATTATCTAAAATTGTCTTTTCCAGAAGGTTTCAAGTGGGAAAGG  
TTGAAGGTCACCAAGGGTGGTCCATTGCCATTTCCTGGGATATTTTGTCTCCACAATTCATGTACGGTTCTAAGGCTTACGTCAAGCACCCAGCTGATATTCAGATTACTTGAAGTTGTCTTTCCAGAAGGTTTCAAGTGGGAA**AGT**

300

GTTATGAATTTGAAGACGGTGGTGTTCGTAACCGTFACTCAAGATTCATCTTTACAGGATGGCGAATTCATATACAAAGTCAAGTTGAGAGGTACGAACTCCCTCCGACGGTCCAGTTATGCAAAAAAGACCATGGGTGGGAGGCC  
GTCATGAACTTCGAAGATGGTGGTGT**GTC**ACCGTCACCCAAGAT**TCT**TCTTTG**CA**AGATGGTGAAT**CA**TTTACAAGGTCAAGTTGAGAGGTACCAACTCC**AT**CTGATGGTCCAGTCATGCAAAAGAAGACCATGGGTGG**CA**AGCT

450

TCTAGCGAAAGAATGTATCCAGAAGATGGTGCTCTGAAAGGAGAAATCAAGCAACGTTTGAATTAAGGATGGTGGTCACTACGACGCTGAAGTTAAACTACATATAAGGCCAAAAAGCCTGTCCAATTGCCAGGTGCATACAACGTT  
TCTTCTGAAAGAATGTACCCAGAAGATGGTGCTTTGAAGGGTGAATTAAGCA**AA**AGATTGAAGTTGAAGGATGGTGGTCACTACGATGCTGAAGTCAAGACC**AC**CTACAAGGCTAAGAAG**CC**AGTCCAATTGCCAGGTGCTTACAACGTT

600

AATATTAAGCTTGATATCACCTCTCATAACGAAGATTATACTATTGTTCGAGCAATACGAAAGAGCTGAAGGTAGACTCCACTGGCGGTATGGACGAATTGTACAAGTAA  
AACATTAAGTTGGATATTACCTCTCACAACGAAGATTACACCATTGT**GAA**CAATACGAAAGAGCTGAAGGTAGACTCTACCGTGGTATGGATGAATTGTACAAGTAA

711

### Supplemental Table 3. Plasmids used in this study.

“Addgene Ref.” numbers can be used to locate plasmid with sequence information and maps at the Addgene plasmid repository ([www.addgene.org](http://www.addgene.org)).

|                            | Plasmid | Alt Name                         | Description                                                                                                                                                           | Ref.               | Addgene Ref. |
|----------------------------|---------|----------------------------------|-----------------------------------------------------------------------------------------------------------------------------------------------------------------------|--------------------|--------------|
| Basic CFLuc codon variants | pTH644  | CENBEVY-U                        | Centromeric <i>URA3</i> marker plasmid containing bidirectional expression cassette, for simultaneous expression of genes from <i>TDH3</i> and <i>ADH1</i> promoters. | (Chu et al., 2011) | 29695        |
|                            | pTH645  | CEN_R                            | CENBEVY-U with Renilla luciferase (RLuc) expressed from the <i>ADH1</i> promoter.                                                                                     | (Chu et al., 2011) | 29694        |
|                            | pTH726  | CEN_R/minCFLuc                   | pTH645 with a slow codon variant of cytoplasmic FLuc expressed from the <i>TDH3</i> promoter.                                                                         | this study         | 38210        |
|                            | pTH727  | CEN_R/staCFLuc                   | pTH645 with normal codon variant of cytoplasmic FLuc expressed from the <i>TDH3</i> promoter.                                                                         | this study         | 38211        |
|                            | pTH728  | CEN_R/maxCFLuc                   | pTH645 with fast codon variant of cytoplasmic FLuc expressed from the <i>TDH3</i> promoter.                                                                           | this study         | 38212        |
|                            | pTH786  | CEN_R/GAA <sub>10</sub> maxCFLuc | pTH728 including a run of 10 GAA codons following the maxCFLuc start codon                                                                                            | this study         | 45556        |
|                            | pTH787  | CEN_R/GAG <sub>10</sub> maxCFLuc | pTH728 including a run of 10 GAG codons following the maxCFLuc start codon                                                                                            | this study         | 45557        |
|                            | pTH747  | CEN_R/<br>min4maxCFLuc           | As pTH728, but first 4 codons replaced by slow codons                                                                                                                 | this study         | 38213        |
| Mixed CFLuc codon variants | pTH748  | CEN_R/<br>min8maxCFLuc           | As pTH728, but first 8 codons replaced by slow codons                                                                                                                 | this study         | 38214        |
|                            | pTH749  | CEN_R/<br>min12maxCFLuc          | As pTH728, but first 12 codons replaced by slow codons                                                                                                                | this study         | 38215        |
|                            | pTH750  | CEN_R/<br>min16maxCFLuc          | As pTH728, but first 16 codons replaced by slow codons                                                                                                                | this study         | 38216        |
|                            | pTH751  | CEN_R/<br>min53maxCFLuc          | As pTH728, but first 53 codons replaced by slow codons                                                                                                                | this study         | 38217        |



|                                                        |        |                          |                                                                                                                                                                                                                                    |            |       |
|--------------------------------------------------------|--------|--------------------------|------------------------------------------------------------------------------------------------------------------------------------------------------------------------------------------------------------------------------------|------------|-------|
| Basic CFLuc codon variants with slow initiation region | pTH752 | CEN_R/<br>min103maxCFLuc | As pTH728, but first 103 codons replaced by slow codons                                                                                                                                                                            | this study | 38218 |
|                                                        | pTH753 | CEN_R/<br>min346maxCFLuc | As pTH728, but first 346 codons replaced by slow codons                                                                                                                                                                            | this study | 38219 |
|                                                        | pTH754 | CEN_R/<br>max346minCFLuc | As pTH728, but last 201 codons replaced by slow codons                                                                                                                                                                             | this study | 40597 |
|                                                        | pTH738 | CENBEVY-slow             | Variant pTH644 with a uORF-containing leader in the bidirectional expression cassette, which slows initiation rates for mRNAs expressed from the <i>TDH3</i> promoter.                                                             | this study | 38220 |
|                                                        | pTH741 | CENslow_R                | Variant pTH645 with a uORF-containing leader in the bidirectional expression cassette, which slows initiation rates for mRNAs expressed from the <i>TDH3</i> promoter. Expresses Renilla luciferase from the <i>ADH1</i> promoter. | this study | 38221 |
|                                                        | pTH742 | CENslow-R/ minCFLuc      | pTH741 with a slow codon variant of cytoplasmic FLuc expressed from the <i>TDH3</i> promoter via a uORF-containing 5-UTR.                                                                                                          | this study | 38222 |
|                                                        | pTH743 | CENslow-R/ staCFLuc      | pTH741 with normal codon variant of cytoplasmic FLuc expressed from the <i>TDH3</i> promoter via a uORF-containing 5-UTR.                                                                                                          | this study | 38223 |
|                                                        | pTH744 | CENslow-R/ maxCFLuc      | pTH741 with fast codon variant of cytoplasmic FLuc expressed from the <i>TDH3</i> promoter via a uORF-containing 5-UTR.                                                                                                            | this study | 38224 |
|                                                        | pTH729 | CEN_minRLuc              | pTH644 with slow codon variant of RLuc expressed from the <i>TDH3</i> promoter.                                                                                                                                                    | this study | 38225 |
|                                                        | pTH730 | CEN_staRLuc              | pTH644 with normal codon variant of RLuc expressed from the <i>TDH3</i> promoter.                                                                                                                                                  | this study | 38226 |
| Codon variants of other proteins                       | pTH735 | CEN_minHIS3              | pTH644 with slow codon variant of HA-tagged yeast HIS3 expressed from the <i>TDH3</i> promoter.                                                                                                                                    | this study | 38227 |
|                                                        | pTH736 | CEN_staHIS3              | pTH644 with normal codon variant of HA-tagged yeast HIS3 expressed from the <i>TDH3</i> promoter.                                                                                                                                  | this study | 38228 |
|                                                        | pTH737 | CEN_maxHIS3              | pTH644 with fast codon variant of HA-tagged yeast HIS3 expressed from the <i>TDH3</i> promoter.                                                                                                                                    | this study | 38229 |
|                                                        | pTH760 | CEN_mCherry_v3           | Centromeric plasmid expressing v3 variant of mCherry fluorescent protein.                                                                                                                                                          | this study | 40598 |
|                                                        | pTH761 | CEN_mCherry_v4           | Centromeric plasmid expressing v4 variant of mCherry fluorescent protein.                                                                                                                                                          | this study | 40599 |

|                 |        |        |                                                                                                                                 |                    |       |
|-----------------|--------|--------|---------------------------------------------------------------------------------------------------------------------------------|--------------------|-------|
| tRNA<br>plasmid | pTH490 | tQSRTL | Centromeric plasmid, contains genes for the five essential tRNAs encoded by a single chromosomal gene in <i>S. cerevisiae</i> . | (Chu et al., 2011) | 29699 |
|-----------------|--------|--------|---------------------------------------------------------------------------------------------------------------------------------|--------------------|-------|

## qPCR data and mRNA analyses

### 1. qPCR primer sequences.

Primers were designed using the primer design tool provided by Genscript, Piscataway, NJ ( <https://www.genscript.com/ssl-bin/app/primer> ), with a target product size range of 80-150 nucleotides and a target primer T<sub>m</sub> of 58-60 °C. qADH1 primers were designed manually.

| Primer Name | Purpose                                                                                                                                             | Sequence                |
|-------------|-----------------------------------------------------------------------------------------------------------------------------------------------------|-------------------------|
| qMaxFLuc_f  | Target nucleotides 1263-1351 of the MaxCFLuc ORF                                                                                                    | CGACATTGCTTACTGGGACG    |
| qMaxFLuc_r  |                                                                                                                                                     | GAGCAACTTGGTAGCCCTTG    |
| qMaxFLuc5_f | Target nucleotides 600-734 of the MaxCFLuc ORF                                                                                                      | CTCTACTGGCTTGCCAAAGG    |
| qMaxFLuc5_r |                                                                                                                                                     | TGGTGAATGGAACAACAGA     |
| qMinFLuc5_f | Target nucleotides 32-137 of the MinCFLuc ORF                                                                                                       | CTGCGCCCTTCTATCCTCTC    |
| qMinFLuc5_r |                                                                                                                                                     | TGTGCATCCGTAAACGCTAT    |
| qREN_f      | Target nucleotides 758-880 of the RLuc ORF                                                                                                          | TGTTTATTGAATCGGACCCA    |
| qREN_r      |                                                                                                                                                     | CATCAGGTGCATCTTCTTGC    |
| qADH1_f     | Target a 70 nt long sequence in the <i>ADH1</i> -derived 3'-UTR present in the recombinant protein expression constructs.                           | TGCAAGCTTTGGACTTCTTC    |
| qADH1_r     |                                                                                                                                                     | CAAGGTAGACAAGCCGACAA    |
| qHIS3_f     | Target a 88 nt-long sequence in the <i>HIS3</i> mRNA starting at nucleotide 658 of the ORF and extending 82 nucleotides into the <i>HIS3</i> 3'-UTR | ATGTAGTGACACCGATTATTTA  |
| qHIS3_r     |                                                                                                                                                     | TACATACTTACTGACATTCATAG |
| qLEU3_f     | Target a 134-nt long sequence in the <i>LEU3</i> mRNA, comprising nucleotides 2125-2259 of the ORF                                                  | CAGCAACTAAGGACAAGG      |
| qLEU3_r     |                                                                                                                                                     | GGTCGTTAATGAGCTTCC      |

### 2. qPCR protocol.

2 oD units of yeast cells transformed with the recombinant protein expressing plasmids and grown in SC medium lacking uracil to an oD<sub>600</sub> of 0.5-0.9 were harvested and frozen at -20 °C. For data in figure 7, 2 oD units of cells grown in YPD to an oD<sub>600</sub> of 0.7-0.8 were used. RNA was prepared from cells using an RNA easy kit (QIAGEN, UK) including the optional DNase digest step.

Apparent primer efficiencies were determined by preparing 2-fold serial dilutions of RNA samples containing target mRNA and analysing the resulting data as described in Pfaffl *et al.* (2001).

Primer specificity was verified by separating final PCR products on a 2% agarose gel where all primers yielded a single product of the expected size.

### 3. Primers used for different constructs.

qPCR data displayed in figure 2 were generated using primers qADH1 directed against the 3'-UTRs of the codon variant mRNAs, and primers qLEU3 which are directed against the internal standard mRNA.

qPCR data in figure 3 were generated using primers qADH1 directed against the 3'-UTRs of the different CFLuc mRNAs, and primers qREN for the internal standard.

qPCR data in figure 4 were generated as described below.

qPCR data for the maxCFLuc/max346minCFLuc comparison in figure 5 were generated using primers qmaxFLuc5, which are directed against the codon optimised part of the sequence shared between maxCFLuc and max346minCFLuc, and using primers qREN for the internal standard. The data for minCFLuc in this figure are from the maxCFLuc/minCFLuc comparison in figure 4.

qPCR data in figure 6 were generated using primers qmaxFLuc, and using primers qREN for the internal standard.

qPCR data in figure 7 were generated using primers qHIS3 which are directed against the invariant 3'-UTR of the *HIS3* codon variant mRNAs, and using primers qADH1 for the internal standard

To generate data for the mixed codon variants in figure 4, we employed a strategy using two pairs of primers (qmaxFLuc and qminFLuc5) as follows, with qREN as internal standard for all reactions.

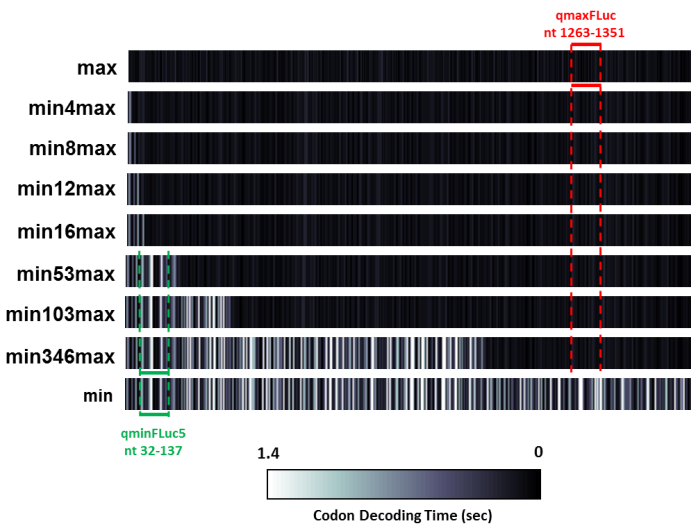

Primers qmaxFLuc anneal to the codon optimised sequence common to maxCFLuc and all mixed codon variants in this figure. Primers qminFLuc5 anneal to the codon-disoptimised sequence common to minCFLuc and min346/103/53CFLuc. qPCR reactions were run for each template with all primer pairs targeting that template.

RNA samples were prepared at least in triplicate from independently cultured cells expressing the different CFLuc constructs. qPCR reactions were prepared combining each RNA sample with each primer pair targeting the expressed CFLuc construct in that sample. qREN primers were used to generate an internal standard.

The fold difference to the average signal for the primer pair used was calculated, based on the  $\Delta C_t$  to the average  $C_t$  and the experimentally determined efficiency for that primer. All minFLuc5 values were adjusted so that the average value for min53max, min103max and min346max was the same as the average maxFLuc value

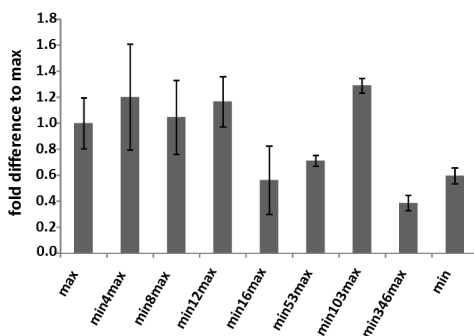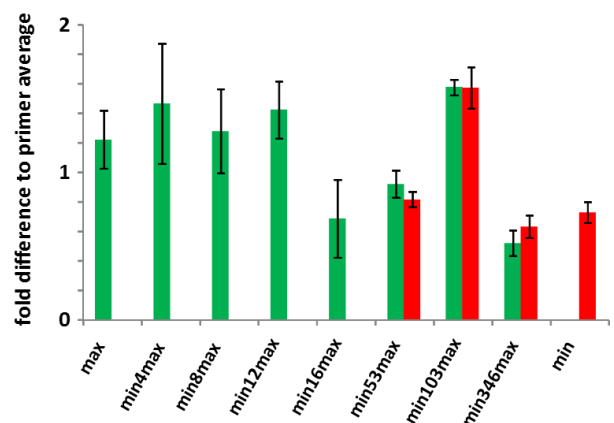

Data were normalised to the max value and where multiple primers were used for the same sample values were averaged to generate data used in figure 4.

### 4. References

Pfaffl MW (2001) A new mathematical model for relative quantification in real-time RT-PCR. *Nucleic Acids Res* **29**: e45.
